# Supplementary material
Source: publisher figshare collection journal article supplement (https://microbiology.figshare.com/ndownloader/files/20065595)
Supplement: Supplementary file 1 [file 20065595]

## Sheet: Table S8
Sample	ViPR Classification	Origin	Collection Year
HQ705624	DENV-2 III (AsianAmerican)	Nicaragua	2009
KY977454	DENV-2 III (AsianAmerican)	Panama	2011
KY474330	DENV-2 III (AsianAmerican)	Ecuador	2014
FJ024473	DENV-2 III (AsianAmerican)	Colombia	2005
JX669476	DENV-2 III (AsianAmerican)	Brazil	2010
JN819419	DENV-2 III (AsianAmerican)	Brazil	2000
KF955364	DENV-2 III (AsianAmerican)	Puerto Rico	2006
JX669480	DENV-2 III (AsianAmerican)	Brazil	1995
FJ639699	DENV-2 III (AsianAmerican)	Cambodia	2002
EU482449	DENV-2 III (AsianAmerican)	Viet Nam	2006
EU482778	DENV-2 III (AsianAmerican)	Viet Nam	2003
KY586692	DENV-2 V (AsianI)	Thailand	2001
KY586679	DENV-2 V (AsianI)	Thailand	2001
KY586571	DENV-2 V (AsianI)	Thailand	2006
KY586572	DENV-2 V (AsianI)	Thailand	2006
EU726767	DENV-2 V (AsianI)	Thailand	1994
GQ868591	DENV-2 V (AsianI)	Thailand	1964
KF704356	DENV-2 IV (AsianII)	Cuba	1981
JQ922552	DENV-2 I (American)	India	1960
KJ918750	DENV-2 I (American)	India	2007
JQ922553	DENV-2 I (American)	India	1980
GQ868592	DENV-2 I (American)	Colombia	1986
JX966379	DENV-2 I (American)	Mexico	1994
GQ398257	DENV-2 I (American)	Indonesia	1977
KY923048	DENV-2 VI (Sylvatic)	Malaysia	2015
JF260983	DENV-2 VI (Sylvatic)	Spain	2009
KY937189	DENV-2 II (Cosmopolitan)	China	2015
KY937188	DENV-2 II (Cosmopolitan)	China	2015
KY937187	DENV-2 II (Cosmopolitan)	China	2015
JQ955624	DENV-2 II (Cosmopolitan)	India	2011
KU509271	DENV-2 II (Cosmopolitan)	India	2006
KF041232	DENV-2 II (Cosmopolitan)	Pakistan	2011
JQ922551	DENV-2 II (Cosmopolitan)	India	2005
JX475906	DENV-2 II (Cosmopolitan)	India	2009
MG779194	DENV-2 II (Cosmopolitan)	Kenya	2017
FJ882602	DENV-2 II (Cosmopolitan)	Sri Lanka	1996
EU056810	DENV-2 II (Cosmopolitan)	Burkina Faso	1983
KY627763	DENV-2 II (Cosmopolitan)	Burkina Faso	2016
KM279515	DENV-2 II (Cosmopolitan)	Singapore	2011
KX452015	DENV-2 II (Cosmopolitan)	Malaysia	2014
KC762662	DENV-2 II (Cosmopolitan)	Indonesia	2007
KU509270	DENV-2 II (Cosmopolitan)	Unknown	2012
KP012546	DENV-2 II (Cosmopolitan)	China	2014
KX452034	DENV-2 II (Cosmopolitan)	Malaysia	2014
KX452048	DENV-2 II (Cosmopolitan)	Malaysia	2014
KX452044	DENV-2 II (Cosmopolitan)	Malaysia	2014
HM488257	DENV-2 II (Cosmopolitan)	Guam	2001
KU509277	DENV-2 II (Cosmopolitan)	Philippines	2010
KU509269	DENV-2 II (Cosmopolitan)	Philippines	2009
KU509274	DENV-2 II (Cosmopolitan)	Philippines	2010
GQ398263	DENV-2 II (Cosmopolitan)	Indonesia	1975
